# Supplementary material for: Glycan-functionalized diamond nanoparticles as potent E. coli anti-adhesives
Source: Royal Society of Chemistry journal article supplement (doi:10.1039/c3nr33826f), 2013-01-01
Supplement: c3nr33826f.pdf [file c3nr33826f.pdf]

## SUPPLEMENTARY MATERIALS

### **Glycan-functionalized diamond nanoparticles: exceptional inhibition of *E. coli* type 1 fimbriae-mediated adhesion**

Alexandre Barras,<sup>a,#</sup> Fernando Ariel Martin,<sup>b,#</sup> <sup>1</sup> Omprakash Bande,<sup>c,2</sup> Jean-Sébastien  
Baumann,<sup>c</sup> Jean-Marc Ghigo,<sup>b</sup> Rabah Boukherroub,<sup>a</sup> Christophe Beloin,<sup>b,\*</sup> Aloysius  
Siriwardena,<sup>c,\*</sup> Sabine Szunerits<sup>a,\*</sup>

<sup>a</sup> *Institut de Recherche Interdisciplinaire (IRI, USR CNRS 3078), Université Lille 1, Parc de la  
Haute Borne, 50 Avenue de Halley, BP 70478, 59658 Villeneuve d'Ascq, France.*

<sup>b</sup> *Institut Pasteur, Unité de Génétique des Biofilms, 25 rue du Dr. Roux, 75724 Paris cedex 15,  
France.*

<sup>c</sup> *Laboratoire des Glucides (FRE 3517 CNRS), Université de Picardie Jules Vernes, 33 rue saint  
Leu, 80039 Amiens, France.*

---

# equivalent contribution

<sup>1</sup> present address: INSERM U1001, Université Paris Descartes, Faculté de Médecine Necker,  
156 rue de Vaugirard 75015 Paris, France

<sup>2</sup> present address: Rega Institute for Medical Research, Laboratory for Medicinal Chemistry,  
Minderbroedersstraat 10, B-[3000](#) Leuven, Belgium

\* to whom correspondence should be sent: [cbeloin@pasteur.fr](mailto:cbeloin@pasteur.fr);  
[aloysius.siriwardena@u-picardie.fr](mailto:aloysius.siriwardena@u-picardie.fr); [Sabine.Szunerits@iri.univ-lille1.fr](mailto:Sabine.Szunerits@iri.univ-lille1.fr)

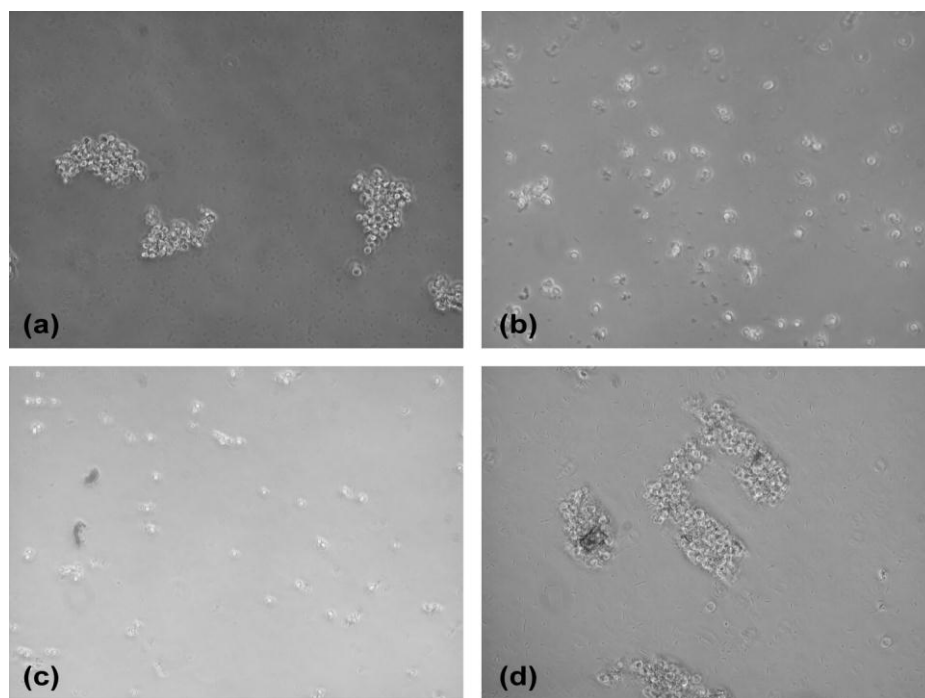

**Figure S1.** Representative optical microscopy images of yeast agglutination assay in the absence or presence of the inhibitors. Bacteria expressing type 1 fimbriae were grown under static conditions, washed and incubated with (a) PBS; (b) methyl- $\alpha$ -D-mannopyranoside,  $\alpha$ mmp (7 mM); (c) ND-Mannose ( $19.4 \mu\text{g}\cdot\text{mL}^{-1}$ ,  $6.8 \mu\text{M}$ ); (d) ND-No sugar ( $500 \mu\text{g}\cdot\text{mL}^{-1}$ ). Cells were incubated for 5 min and yeast ( $1 \text{ OD}_{600}$ ) were added and samples observed under the microscope. The experiments were performed in triplicate and at least on three independent occasions experiments.
